# Supplementary material for: Highly Stretchable Double Network Ionogels for Monitoring Physiological Signals and Detecting Sign Language
Source: MDPI journal article supplement (doi:10.3390/bios14050227), 2024-05-03
Supplement: s1 [file s1]

Supporting information

# Highly Stretchable Double Network Ionogels for Monitoring Physiological Signals and Detecting Sign Language

Ya Jiang, Shujing Zhao, Fengyuan Wang, Xiaoyuan Zhang \* and Zhiqiang Su \*

State Key Laboratory of Chemical Resource Engineering, Beijing Key Laboratory of Advanced Functional Polymer Composites, Beijing University of Chemical Technology, Beijing 100029, China;  
2021200427@buct.edu.cn (Y.J.); 2021400142@buct.edu.cn (S.Z.); 15832848097@163.com (F.W.)

\* Correspondence: xiaoyuan.zhang@buct.edu.cn (X.Z.); suzq@mail.buct.edu.cn (Z.S.)

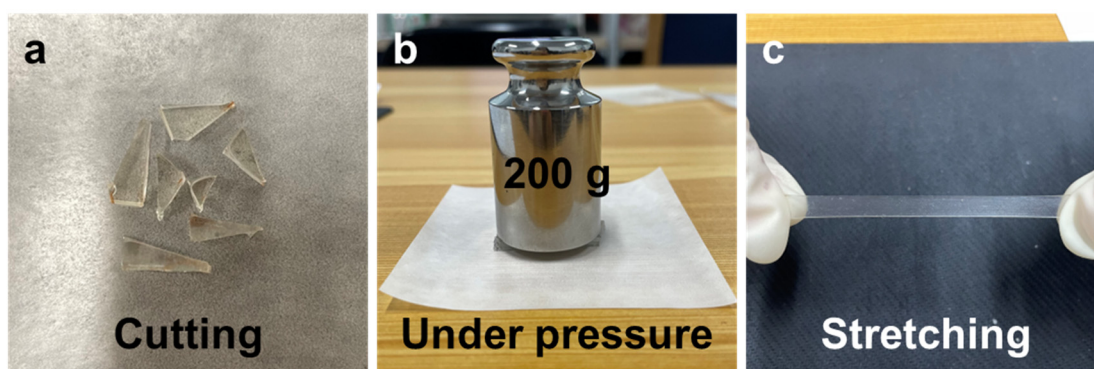

**Figure S1.** Ionogels were (a) cut into pieces, (b) placed under pressure, and (c) stretched to demonstrate that there was no IL leakage.

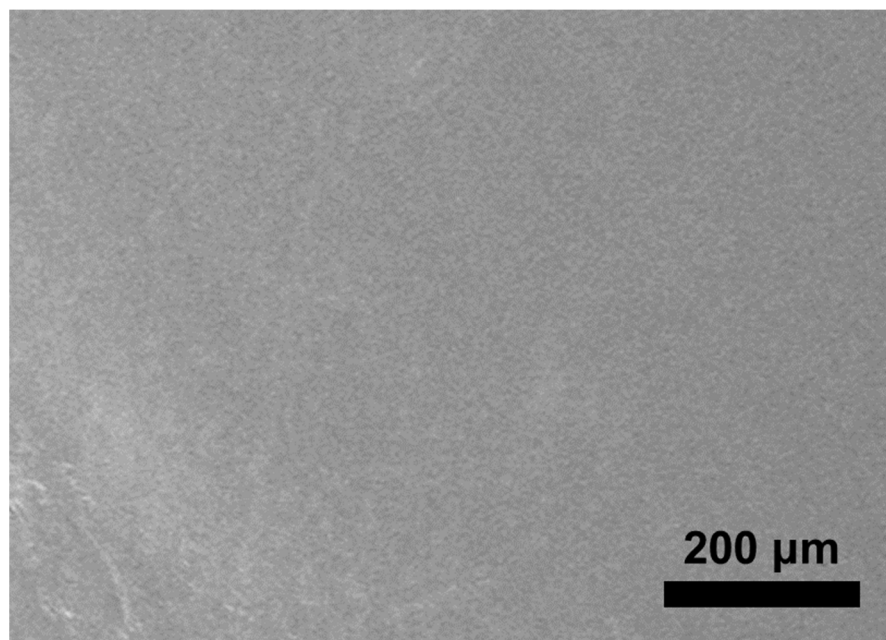

**Figure S2.** SEM image of the surface of PAM<sub>40</sub>/PVA<sub>6-1</sub>.

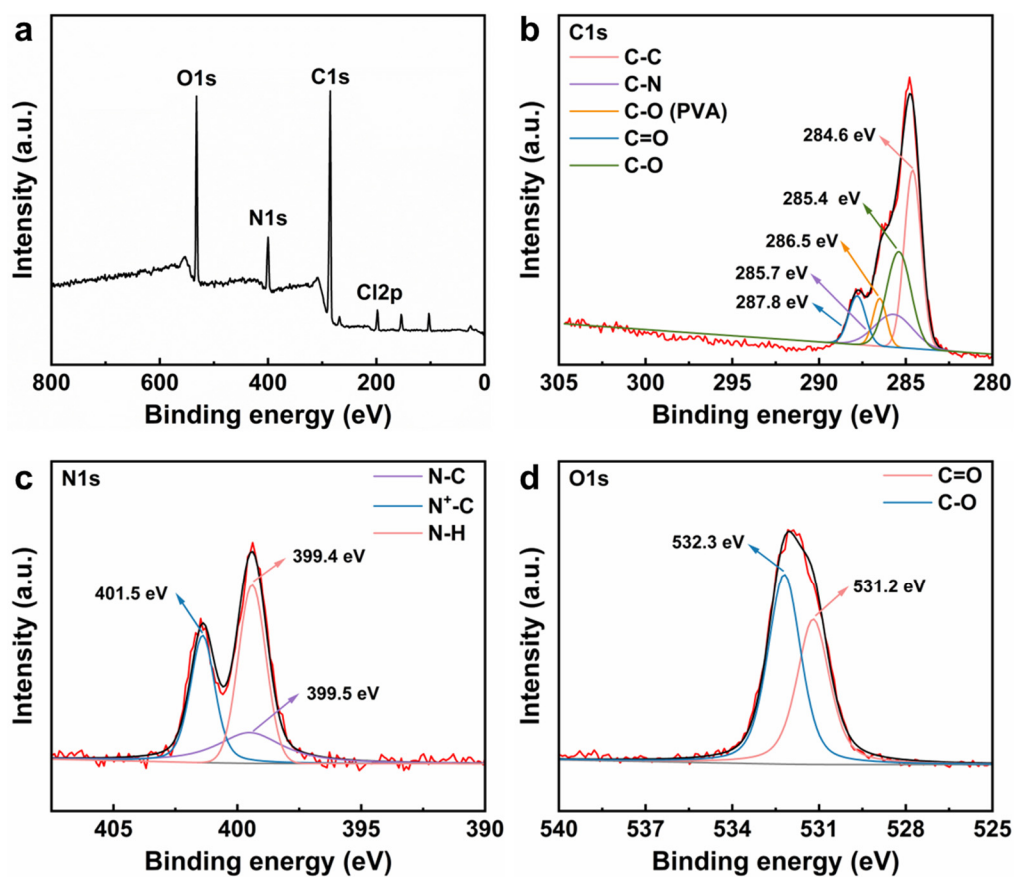

**Figure S3.** (a) Total XPS spectrum of PAM<sub>40</sub>/PVA<sub>6-1</sub>. (b) C1s, (c) N1s, and (d) O1s spectrum of PAM<sub>40</sub>/PVA<sub>6-1</sub>.

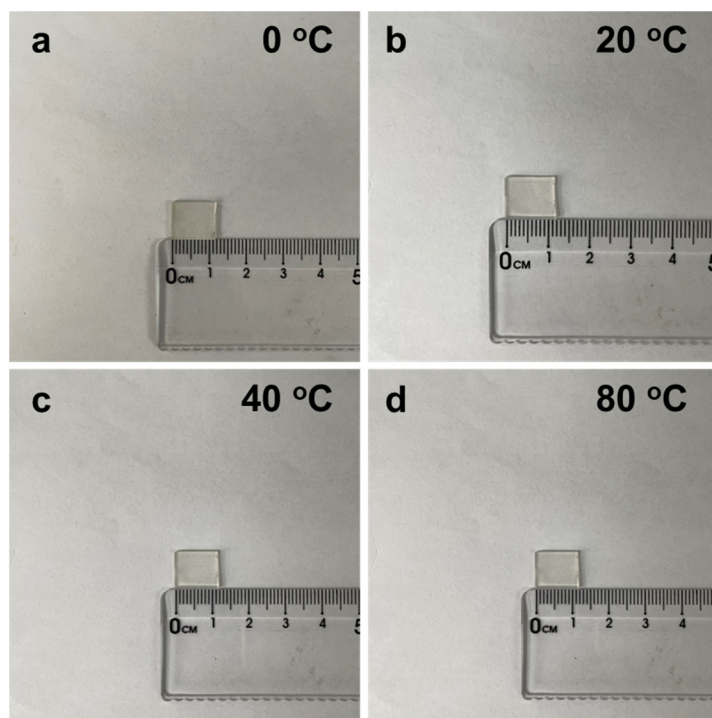

**Figure S4.** (a-d) Pictures of the same piece of PAM<sub>40</sub>/PVA<sub>6-1</sub> placed successively at 0, 20, 40 and 80 °C for 10 min.

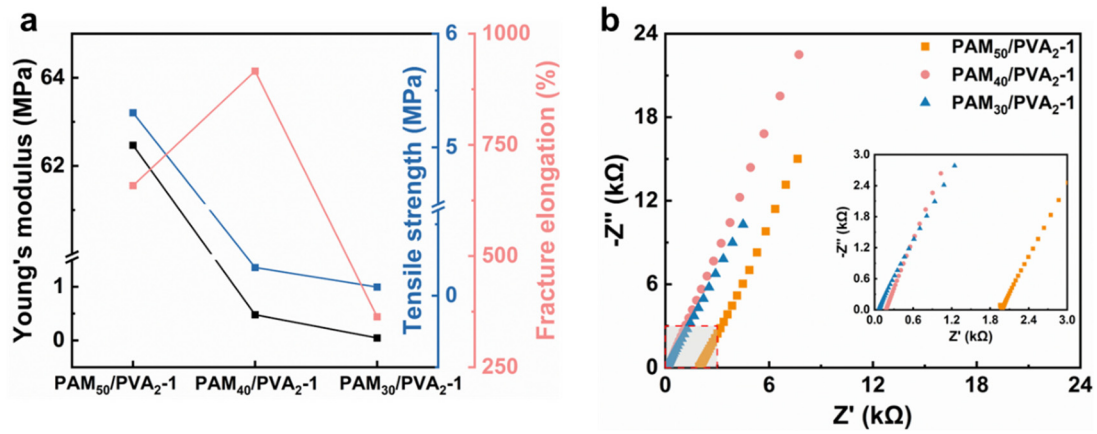

**Figure S5.** (a) Young's modulus, tensile strength and fracture elongation of ionogels with different IL contents. (b) Electrochemical impedance spectroscopy plots of ionogels with different IL contents.

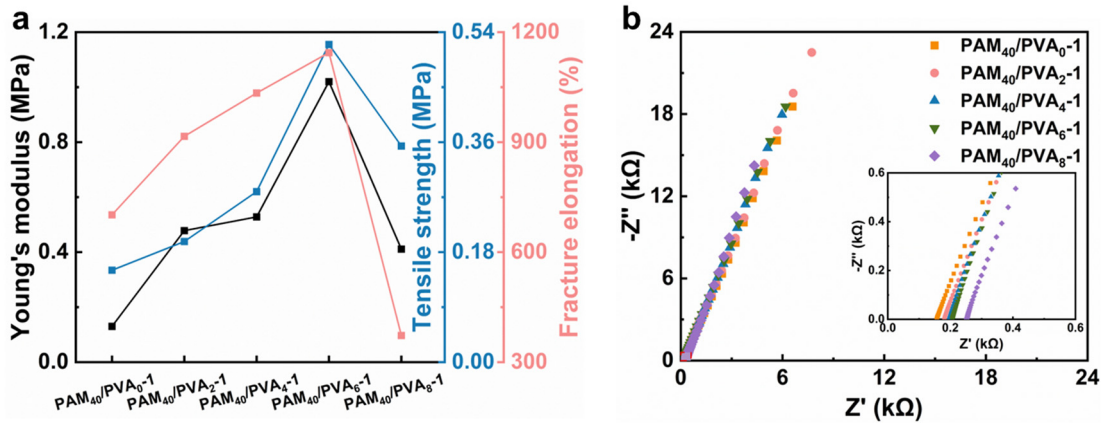

**Figure S6.** (a) Young's modulus, tensile strength and fracture elongation of ionogels with different PVA contents. (b) Electrochemical impedance spectroscopy plots of ionogels with different PVA contents.

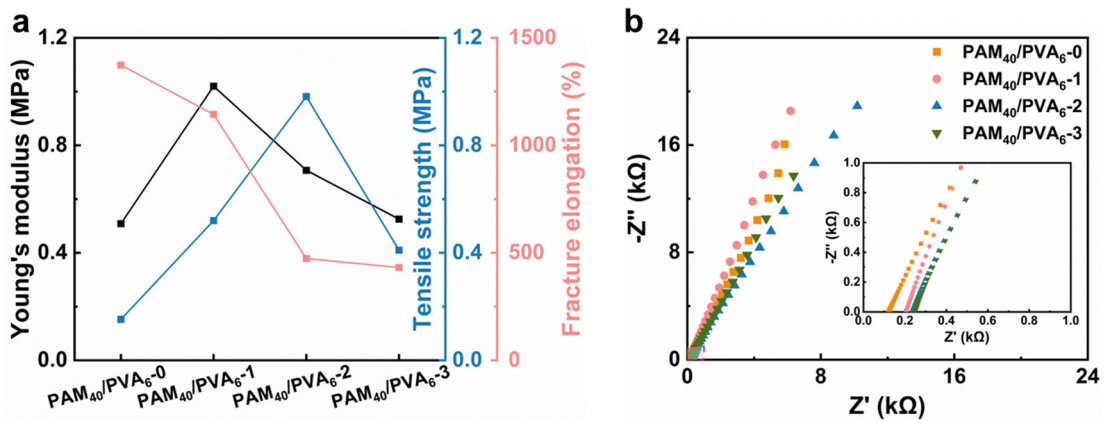

**Figure S7.** (a) Young's modulus, tensile strength and fracture elongation of ionogels with different PEGDA contents. (b) Electrochemical impedance spectroscopy plots of ionogels with different PEGDA contents.

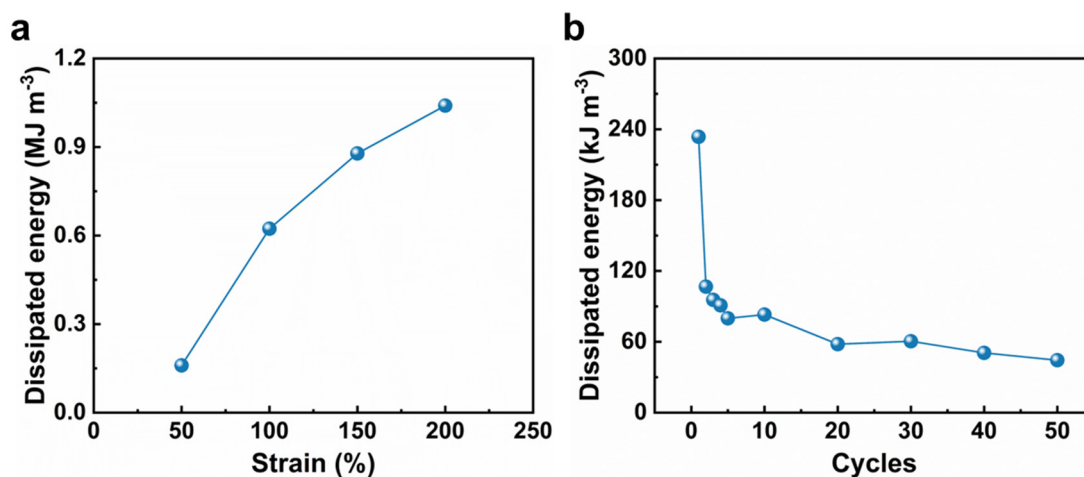

**Figure S8.** (a) The energy dissipated by ionogel during cyclic tensile testing at different strains. (b) The energy dissipated by the ionogel during cyclic tensile testing at 50% strain as a function of the number of cycles.

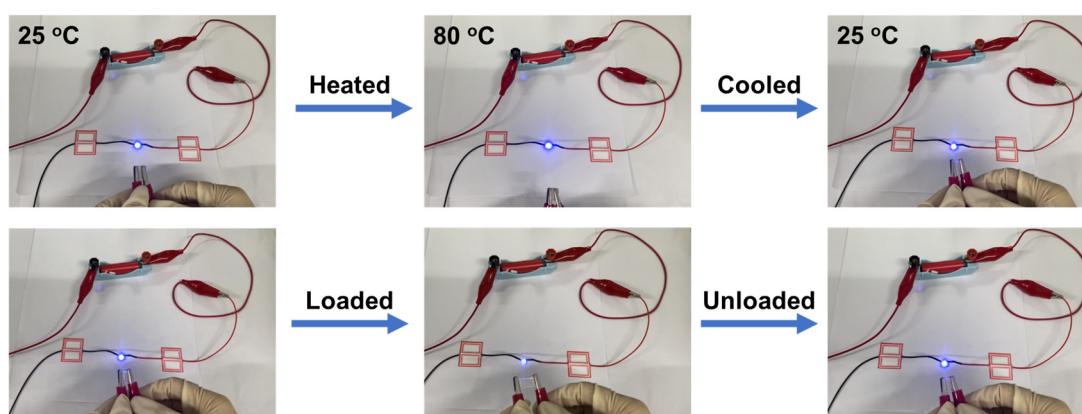

**Figure S9.** The brightness of the LED changed with temperature and strain when the ionogel was placed in a closed circuit as a conductor.
